# Supplementary material
Source: HighWire-hosted journal article supplement (http://molpharm.aspetjournals.org/highwire/filestream/76617/field_highwire_adjunct_files/0/Supplemental_Figures.pdf)

**Supplemental fig. 1. Correlation of receptor activation and surface expression for multiple DNA**

**concentrations.** HEK293 cells were transiently transfected with Gqi4myr, the reporter plasmid (CREB/Luc system) and 12 concentrations of FLAG-tagged wt EBI2 receptor (0-35 ng/80,000), and the CREB activity (A) was determined in parallel with surface expression (B) for all DNA concentrations. The results are given as percent  $\pm$  SEM relative to the value at 15 ng/80,000 (marked in red on both figures).

**Supplemental fig. 2. Correlation of receptor activation and surface expression for F(VI:13) mutants.**

HEK293 cells were transiently transfected with Gqi4myr, reporter plasmid (CREB/Luc system) and 5 different concentrations of FLAG-tagged constructs being 1-10 ng for EBI2 wt and 25-50 ng for the two F(VI:13) mutants. The results are pooled raw data  $\pm$  SEM from 4 independent experiments with corresponding cell surface expression and CREB activity presented on the abscissa and ordinate axes, respectively. The shaded box indicates the data points presented in Fig. 3B.

**Supplemental fig. 3. Correlation of receptor activation and surface expression for I(III:03) mutants.**

HEK293 cells were transiently transfected with Gqi4myr, reporter plasmid (CREB/Luc system) and 5 different concentrations of FLAG-tagged constructs being 1-10 ng for EBI2 wt and 25-50 ng for the two I(III:03) mutants. The results are pooled raw data  $\pm$  SEM from 4 independent experiments with corresponding cell surface expression and CREB activity presented on the abscissa and ordinate axes, respectively.

# Supplemental figure 1

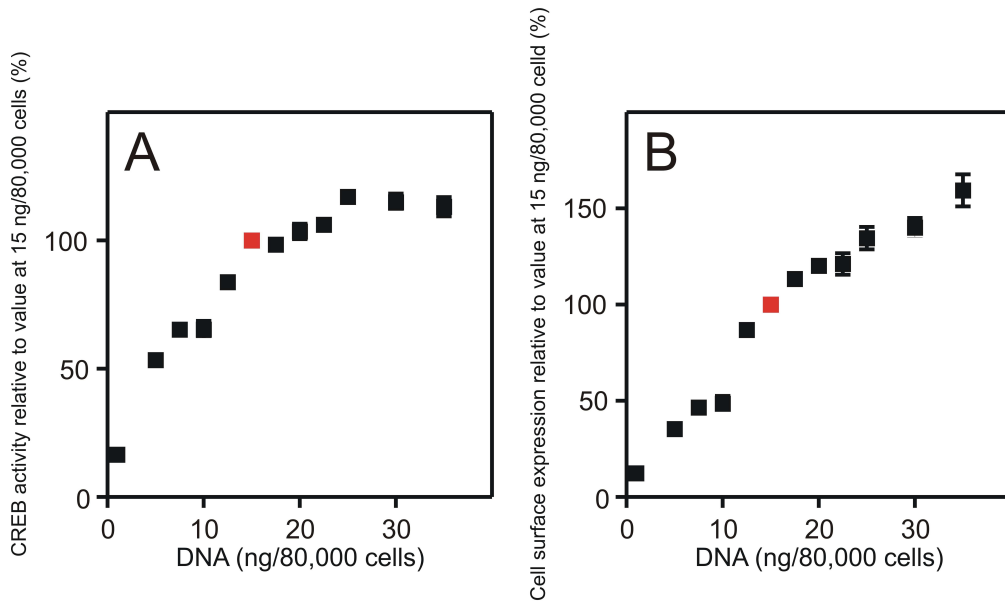

## Supplemental figure 2

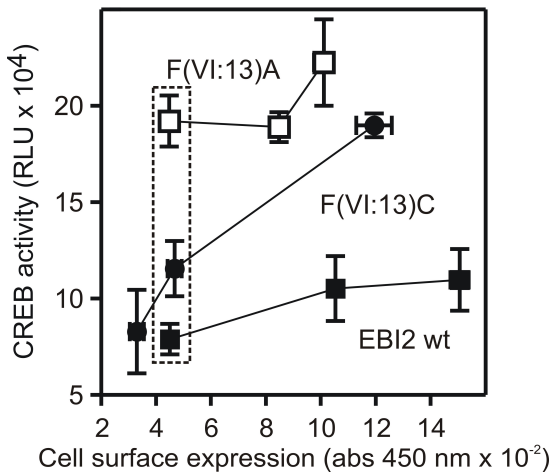

## Supplemental figure 3

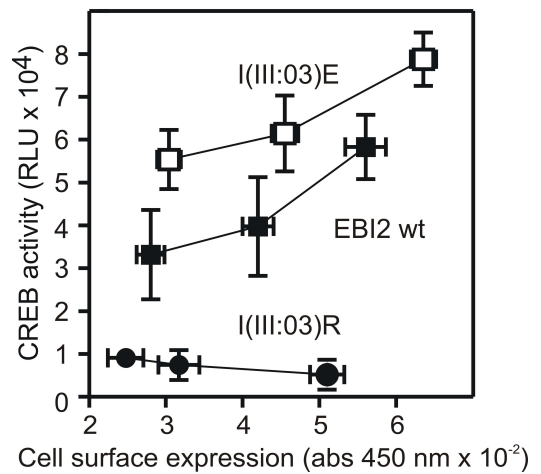

Supplement: Supplemental_Figures.pdf [file Supplemental_Figures.pdf]
